# Supplementary material for: Characterisation of the canine faecal virome in healthy dogs and dogs with acute diarrhoea using shotgun metagenomics
Source: PubMed Central journal article supplement (PMC5453527; doi:10.1371/journal.pone.0178433), 2017-06-01
Supplement: pone.0178433.s001.pdf [file pone.0178433.s001.pdf]

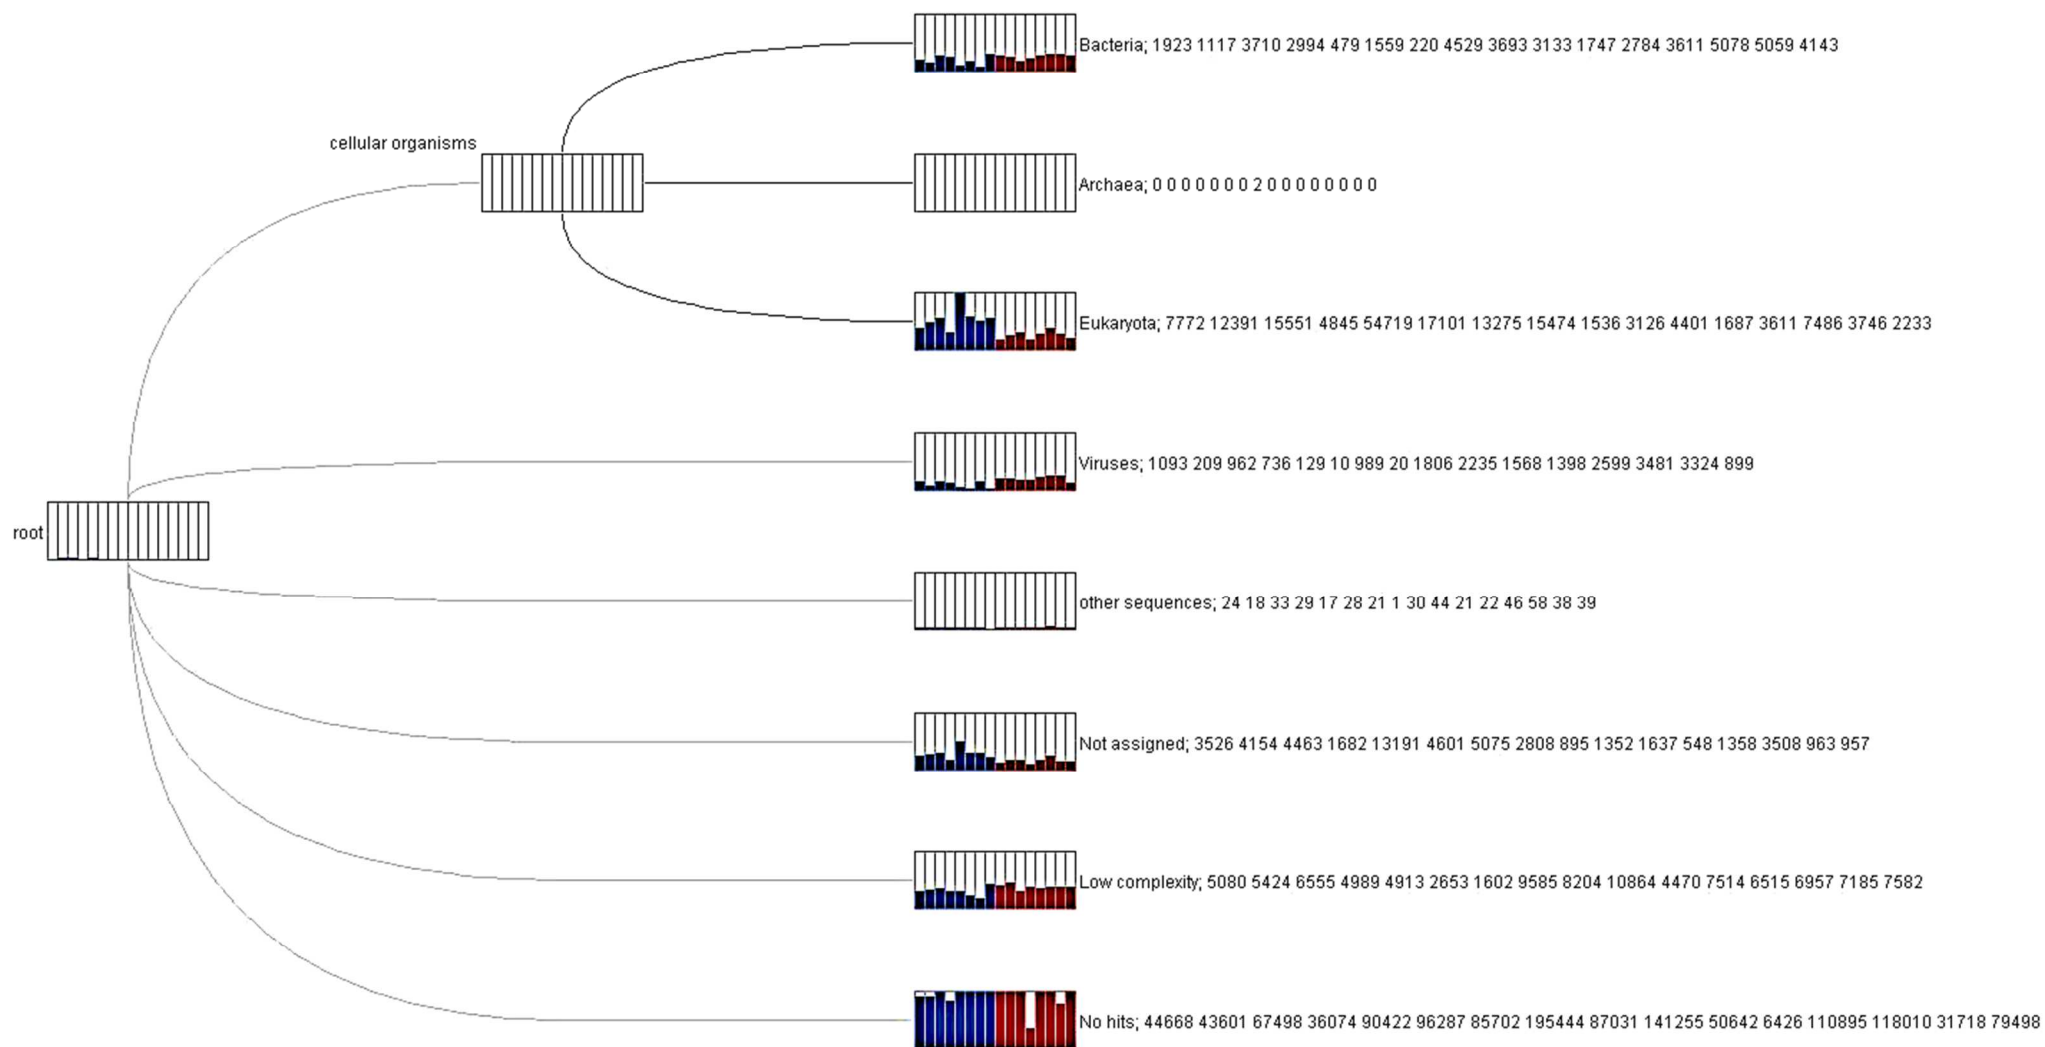

**Figure S1:** MEGAN taxonomic tree showing distribution and number of contigs/singletons in each sample. Numbers next to the charts indicate the numbers of contigs/singletons in each sample at every taxa. Root: contigs/singletons of all samples after *de novo* assembly. Blue columns: healthy samples, Red columns: dogs with acute diarrhoea samples
