# Supplementary material for: Characterisation of the canine faecal virome in healthy dogs and dogs with acute diarrhoea using shotgun metagenomics
Source: PubMed Central journal article supplement (PMC5453527; doi:10.1371/journal.pone.0178433), 2017-06-01
Supplement: pone.0178433.s005.pdf [file pone.0178433.s005.pdf]

**Table S2:** Oligonucleotides used in characterisation of canine astrovirus

| Oligonucleotide    | Sequence                  | Reference           |
|--------------------|---------------------------|---------------------|
| 625F-1             | GTACTATACCRTTCTGATTTAATT  | Martella et al 2011 |
| 626R-1             | AGACCAARGTGTCATAGTTCAG    | Martella et al 2011 |
| 501F20             | CTAACAATCGTGGTCGCAAG      | Grellet 2012        |
| 1156R21            | TTGATTTGTGCATCCTTGTC      | Grellet 2012        |
| ORF1a              | TGAAGGACTGCTCAGAGTG       | Caddy 2015          |
| PM_ASTRO_DD1_1F    | CCAAGAGTTGGTTTGGGTGATTA   | This study          |
| PM_ASTRO_DD1_349R  | GCACTCTGAGCAGTCCTTCA      | This study          |
| PM_ASTRO_DD1_1201F | CTGATGTCCTCTGTCGGTAACAA   | This study          |
| PM_ASTRO_DD1_3185R | TGCTCCGGACATAATCCTTGAA    | This study          |
| PM_ASTRO_DD1_3527F | TGCCGAACAGAGGAGGAAAT      | This study          |
| PM_ASTRO_DD1_4908R | GGGAGCATTCTGGTAGGTGG      | This study          |
| PM_ASTRO_DD1_4357F | CGTGGTCGCAAGAGAGTTGA      | This study          |
| PM_ASTRO_DD1_5854R | AGTTGGAGTAGCGTATCTGGC     | This study          |
| PM_ASTRO_DD1_5525F | AATACCAGCAGAACCCACCG      | This study          |
| PM_ASTRO_DD1_6526R | AAAAGAAAAGAGTGAAAGTGAACCT | This study          |
